# Supplementary material for: The spleen microbiota of small wild mammals reveals distinct patterns with tick-borne bacteria
Source: PLoS Negl Trop Dis. 2018 Jul 5;12(7):e0006499. doi: 10.1371/journal.pntd.0006499 (PMC6033388; doi:10.1371/journal.pntd.0006499)
Supplement: S2 Table — (XLSX) [file pntd.0006499.s004.xlsx]

## Sheet: Sheet1
	CS21	CS15	CS84	CS62	CS99	CS30	CS110	CS91	CS85	CS18	CS37	CS16	CS19	CS97	CS57	CS38	CS5	CS72	CS51	CS65	CS118	CS47	CS70	CS40	CS56	CS98	CS55	CS90	CS92	CS63	CS39	CS7	CS6	CS34	CS88
CS21	0	0.230177	0.356525	0.534984	0.559075	0.441262	0.357648	0.402403	0.366633	0.57053	0.623315	0.330526	0.164308	0.63668	0.886905	0.326258	0.151168	0.182895	0.157401	0.45137	0.28111	0.17582	0.173349	0.335523	0.759771	0.145103	0.922507	0.585916	0.570811	0.669643	0.945474	0.139881	0.538354	0.217936	0.16195
CS15	0.230177	0	0.270553	0.490678	0.515274	0.400045	0.247585	0.420261	0.268363	0.524652	0.590746	0.226022	0.243037	0.604335	0.881851	0.227426	0.199629	0.257356	0.207266	0.347709	0.31323	0.205076	0.254212	0.268194	0.768643	0.180144	0.918576	0.546833	0.535265	0.633086	0.943902	0.194182	0.496518	0.216251	0.194351
CS84	0.356525	0.270553	0	0.50292	0.53111	0.375505	0.175371	0.459288	0.172058	0.558401	0.638758	0.143868	0.343497	0.642913	0.884939	0.200696	0.350348	0.364274	0.331536	0.309299	0.41852	0.309299	0.392127	0.345463	0.76971	0.28257	0.921159	0.603324	0.583502	0.635389	0.945474	0.308008	0.514712	0.271956	0.294587
CS62	0.534984	0.490678	0.50292	0	0.14881	0.580133	0.52409	0.65274	0.477145	0.204515	0.419137	0.482592	0.546889	0.436658	0.854223	0.534704	0.524652	0.541217	0.530211	0.598495	0.583558	0.468778	0.540038	0.581929	0.846024	0.505952	0.865229	0.302224	0.33002	0.753875	0.929245	0.515611	0.179358	0.509097	0.509378
CS99	0.559075	0.515274	0.53111	0.14881	0	0.612478	0.55228	0.674641	0.516453	0.188511	0.40931	0.508929	0.575696	0.361972	0.866408	0.561545	0.550651	0.571092	0.552898	0.625674	0.610849	0.497417	0.568958	0.605234	0.859951	0.531278	0.878369	0.304695	0.345856	0.775101	0.936826	0.538017	0.258704	0.534479	0.534928
CS30	0.441262	0.400045	0.375505	0.580133	0.612478	0	0.374888	0.477257	0.376965	0.612365	0.669867	0.372473	0.444295	0.680649	0.887242	0.398416	0.428459	0.450416	0.412736	0.425932	0.471867	0.416161	0.476864	0.453223	0.762129	0.418071	0.920317	0.63741	0.615061	0.663017	0.945979	0.41122	0.594227	0.378706	0.393924
CS110	0.357648	0.247585	0.175371	0.52409	0.55228	0.374888	0	0.4667	0.179975	0.56104	0.640667	0.150101	0.342037	0.636456	0.883872	0.185984	0.349	0.364387	0.323113	0.303684	0.417734	0.314128	0.392408	0.324236	0.777684	0.285883	0.920036	0.60046	0.579908	0.633086	0.945193	0.298854	0.534479	0.274315	0.293913
CS91	0.402403	0.420261	0.459288	0.65274	0.674641	0.477257	0.4667	0	0.474	0.679638	0.695979	0.452381	0.417958	0.708277	0.880279	0.4521	0.402909	0.421664	0.41004	0.531053	0.409198	0.423237	0.425764	0.444969	0.754885	0.415094	0.904762	0.691206	0.686545	0.676325	0.938792	0.407794	0.658917	0.411837	0.387242
CS85	0.366633	0.268363	0.172058	0.477145	0.516453	0.376965	0.179975	0.474	0	0.550988	0.628313	0.142633	0.352482	0.629268	0.874438	0.211927	0.356694	0.373933	0.331368	0.29571	0.42217	0.322776	0.400887	0.34097	0.768756	0.301213	0.911669	0.586703	0.568059	0.62865	0.940027	0.305312	0.482031	0.278077	0.30374
CS18	0.57053	0.524652	0.558401	0.204515	0.188511	0.612365	0.56104	0.679638	0.550988	0	0.414926	0.539926	0.586029	0.417958	0.860231	0.538073	0.559355	0.580806	0.535714	0.62573	0.626292	0.507918	0.581199	0.474225	0.858659	0.540263	0.873428	0.301887	0.34754	0.77555	0.933288	0.548686	0.305874	0.538297	0.544137
CS37	0.623315	0.590746	0.638758	0.419137	0.40931	0.669867	0.640667	0.695979	0.628313	0.414926	0	0.626123	0.622698	0.4448	0.695755	0.625786	0.619104	0.519879	0.606244	0.672001	0.417565	0.607255	0.543239	0.649483	0.70064	0.609726	0.696878	0.189072	0.413578	0.666049	0.755222	0.605851	0.529032	0.603661	0.596979
CS16	0.330526	0.226022	0.143868	0.482592	0.508929	0.372473	0.150101	0.452381	0.142633	0.539926	0.626123	0	0.316992	0.617195	0.883648	0.162343	0.321035	0.340296	0.297451	0.300876	0.386736	0.287006	0.365173	0.305425	0.771956	0.257019	0.918351	0.581705	0.559412	0.629099	0.9448	0.269598	0.49635	0.243935	0.268138
CS19	0.164308	0.243037	0.343497	0.546889	0.575696	0.444295	0.342037	0.417958	0.352482	0.586029	0.622698	0.316992	0	0.634322	0.878987	0.310759	0.141903	0.150719	0.162062	0.445249	0.288129	0.161725	0.161781	0.336983	0.761456	0.124775	0.913073	0.604897	0.587376	0.670373	0.944239	0.121912	0.556491	0.204796	0.155773
CS97	0.63668	0.604335	0.642913	0.436658	0.361972	0.680649	0.636456	0.708277	0.629268	0.417958	0.4448	0.617195	0.634322	0	0.865847	0.619497	0.634715	0.632862	0.61697	0.674191	0.662399	0.626067	0.657401	0.635108	0.867082	0.619946	0.877134	0.456368	0.529425	0.78504	0.935872	0.617531	0.541274	0.619609	0.616745
CS57	0.886905	0.881851	0.884939	0.854223	0.866408	0.887242	0.883872	0.880279	0.874438	0.860231	0.695755	0.883648	0.878987	0.865847	0	0.878257	0.881514	0.788129	0.885276	0.882974	0.770889	0.8823	0.788915	0.877808	0.33513	0.886175	0.401673	0.663017	0.695586	0.538578	0.344733	0.886006	0.871181	0.815701	0.884827
CS38	0.326258	0.227426	0.200696	0.534704	0.561545	0.398416	0.185984	0.4521	0.211927	0.538073	0.625786	0.162343	0.310759	0.619497	0.878257	0	0.319519	0.336478	0.275494	0.317105	0.385894	0.287736	0.362758	0.266341	0.766116	0.253088	0.909535	0.594508	0.57929	0.627246	0.942385	0.273753	0.545934	0.260445	0.270665
CS5	0.151168	0.199629	0.350348	0.524652	0.550651	0.428459	0.349	0.402909	0.356694	0.559355	0.619104	0.321035	0.141903	0.634715	0.881514	0.319519	0	0.162848	0.137354	0.436489	0.269542	0.124382	0.144766	0.320923	0.764207	0.0974843	0.917677	0.574686	0.553908	0.659928	0.945025	0.112927	0.529257	0.194575	0.131795
CS72	0.182895	0.257356	0.364274	0.541217	0.571092	0.450416	0.364387	0.421664	0.373933	0.580806	0.519879	0.340296	0.150719	0.632862	0.788129	0.336478	0.162848	0	0.169755	0.459063	0.195362	0.156671	0.0785602	0.351303	0.662792	0.145328	0.821765	0.500337	0.538859	0.610231	0.845519	0.142857	0.551606	0.21715	0.174304
CS51	0.157401	0.207266	0.331536	0.530211	0.552898	0.412736	0.323113	0.41004	0.331368	0.535714	0.606244	0.297451	0.162062	0.61697	0.885276	0.275494	0.137354	0.169755	0	0.41852	0.278807	0.153583	0.1875	0.293071	0.762129	0.119048	0.92144	0.581536	0.566431	0.660827	0.946597	0.111186	0.534816	0.172619	0.130615
CS65	0.45137	0.347709	0.309299	0.598495	0.625674	0.425932	0.303684	0.531053	0.29571	0.62573	0.672001	0.300876	0.445249	0.674191	0.882974	0.317105	0.436489	0.459063	0.41852	0	0.501965	0.414196	0.483266	0.425258	0.779425	0.402123	0.917621	0.654425	0.635108	0.627246	0.945474	0.404088	0.618598	0.385445	0.396114
CS118	0.28111	0.31323	0.41852	0.583558	0.610849	0.471867	0.417734	0.409198	0.42217	0.626292	0.417565	0.386736	0.288129	0.662399	0.770889	0.385894	0.269542	0.195362	0.278807	0.501965	0	0.283019	0.197945	0.37135	0.647855	0.276673	0.795597	0.434412	0.57564	0.602707	0.814746	0.277853	0.597204	0.282008	0.275101
CS47	0.17582	0.205076	0.309299	0.468778	0.497417	0.416161	0.314128	0.423237	0.322776	0.507918	0.607255	0.287006	0.161725	0.626067	0.8823	0.287736	0.124382	0.156671	0.153583	0.414196	0.283019	0	0.158412	0.34069	0.767352	0.0871518	0.918576	0.520553	0.506907	0.665544	0.942554	0.104616	0.478661	0.155997	0.12427
CS70	0.173349	0.254212	0.392127	0.540038	0.568958	0.476864	0.392408	0.425764	0.400887	0.581199	0.543239	0.365173	0.161781	0.657401	0.788915	0.362758	0.144766	0.0785602	0.1875	0.483266	0.197945	0.158412	0	0.357761	0.663017	0.138365	0.822496	0.494385	0.530773	0.617475	0.844789	0.15246	0.548518	0.24197	0.181211
CS40	0.335523	0.268194	0.345463	0.581929	0.605234	0.453223	0.324236	0.444969	0.34097	0.474225	0.649483	0.305425	0.336983	0.635108	0.877808	0.266341	0.320923	0.351303	0.293071	0.425258	0.37135	0.34069	0.357761	0	0.768587	0.316655	0.917846	0.636961	0.623428	0.636849	0.941543	0.321204	0.585018	0.323675	0.326651
CS56	0.759771	0.768643	0.76971	0.846024	0.859951	0.762129	0.777684	0.754885	0.768756	0.858659	0.70064	0.771956	0.761456	0.867082	0.33513	0.766116	0.764207	0.662792	0.762129	0.779425	0.647855	0.767352	0.663017	0.768587	0	0.766734	0.562612	0.678403	0.719059	0.482985	0.226303	0.762186	0.853212	0.769205	0.766453
CS98	0.145103	0.180144	0.28257	0.505952	0.531278	0.418071	0.285883	0.415094	0.301213	0.540263	0.609726	0.257019	0.124775	0.619946	0.886175	0.253088	0.0974843	0.145328	0.119048	0.402123	0.276673	0.0871518	0.138365	0.316655	0.766734	0	0.921552	0.565027	0.550427	0.665768	0.946822	0.0689016	0.515892	0.149259	0.0938342
CS55	0.922507	0.918576	0.921159	0.865229	0.878369	0.920317	0.920036	0.904762	0.911669	0.873428	0.696878	0.918351	0.913073	0.877134	0.401673	0.909535	0.917677	0.821765	0.92144	0.917621	0.795597	0.918576	0.822496	0.917846	0.562612	0.921552	0	0.678796	0.717262	0.528976	0.541723	0.920092	0.9083	0.849955	0.920597
CS90	0.585916	0.546833	0.603324	0.302224	0.304695	0.63741	0.60046	0.691206	0.586703	0.301887	0.189072	0.581705	0.604897	0.456368	0.663017	0.594508	0.574686	0.500337	0.581536	0.654425	0.434412	0.520553	0.494385	0.636961	0.678403	0.565027	0.678796	0	0.273641	0.647855	0.736354	0.570418	0.407177	0.561714	0.565925
CS92	0.570811	0.535265	0.583502	0.33002	0.345856	0.615061	0.579908	0.686545	0.568059	0.34754	0.413578	0.559412	0.587376	0.529425	0.695586	0.57929	0.553908	0.538859	0.566431	0.635108	0.57564	0.506907	0.530773	0.623428	0.719059	0.550427	0.717262	0.273641	0	0.616465	0.793688	0.556323	0.363713	0.53066	0.552504
CS63	0.669643	0.633086	0.635389	0.753875	0.775101	0.663017	0.633086	0.676325	0.62865	0.77555	0.666049	0.629099	0.670373	0.78504	0.538578	0.627246	0.659928	0.610231	0.660827	0.627246	0.602707	0.665544	0.617475	0.636849	0.482985	0.665768	0.528976	0.647855	0.616465	0	0.613938	0.6656	0.76533	0.65055	0.663522
CS39	0.945474	0.943902	0.945474	0.929245	0.936826	0.945979	0.945193	0.938792	0.940027	0.933288	0.755222	0.9448	0.944239	0.935872	0.344733	0.942385	0.945025	0.845519	0.946597	0.945474	0.814746	0.942554	0.844789	0.941543	0.226303	0.946822	0.541723	0.736354	0.793688	0.613938	0	0.946429	0.939297	0.946204	0.946485
CS7	0.139881	0.194182	0.308008	0.515611	0.538017	0.41122	0.298854	0.407794	0.305312	0.548686	0.605851	0.269598	0.121912	0.617531	0.886006	0.273753	0.112927	0.142857	0.111186	0.404088	0.277853	0.104616	0.15246	0.321204	0.762186	0.0689016	0.920092	0.570418	0.556323	0.6656	0.946429	0	0.521114	0.159928	0.10602
CS6	0.538354	0.496518	0.514712	0.179358	0.258704	0.594227	0.534479	0.658917	0.482031	0.305874	0.529032	0.49635	0.556491	0.541274	0.871181	0.545934	0.529257	0.551606	0.534816	0.618598	0.597204	0.478661	0.548518	0.585018	0.853212	0.515892	0.9083	0.407177	0.363713	0.76533	0.939297	0.521114	0	0.515106	0.515779
CS34	0.217936	0.216251	0.271956	0.509097	0.534479	0.378706	0.274315	0.411837	0.278077	0.538297	0.603661	0.243935	0.204796	0.619609	0.815701	0.260445	0.194575	0.21715	0.172619	0.385445	0.282008	0.155997	0.24197	0.323675	0.769205	0.149259	0.849955	0.561714	0.53066	0.65055	0.946204	0.159928	0.515106	0	0.151393
CS88	0.16195	0.194351	0.294587	0.509378	0.534928	0.393924	0.293913	0.387242	0.30374	0.544137	0.596979	0.268138	0.155773	0.616745	0.884827	0.270665	0.131795	0.174304	0.130615	0.396114	0.275101	0.12427	0.181211	0.326651	0.766453	0.0938342	0.920597	0.565925	0.552504	0.663522	0.946485	0.10602	0.515779	0.151393	0
